# Supplementary material for: Fitness Cost Evolution of Natural Plasmids of Staphylococcus aureus
Source: PubMed Central journal article supplement (PMC8545097; doi:10.1128/mbio.03094-20), 2021-02-23
Supplement: mbio.03094-20-sf001.pdf [file mbio.03094-20-sf001.pdf]

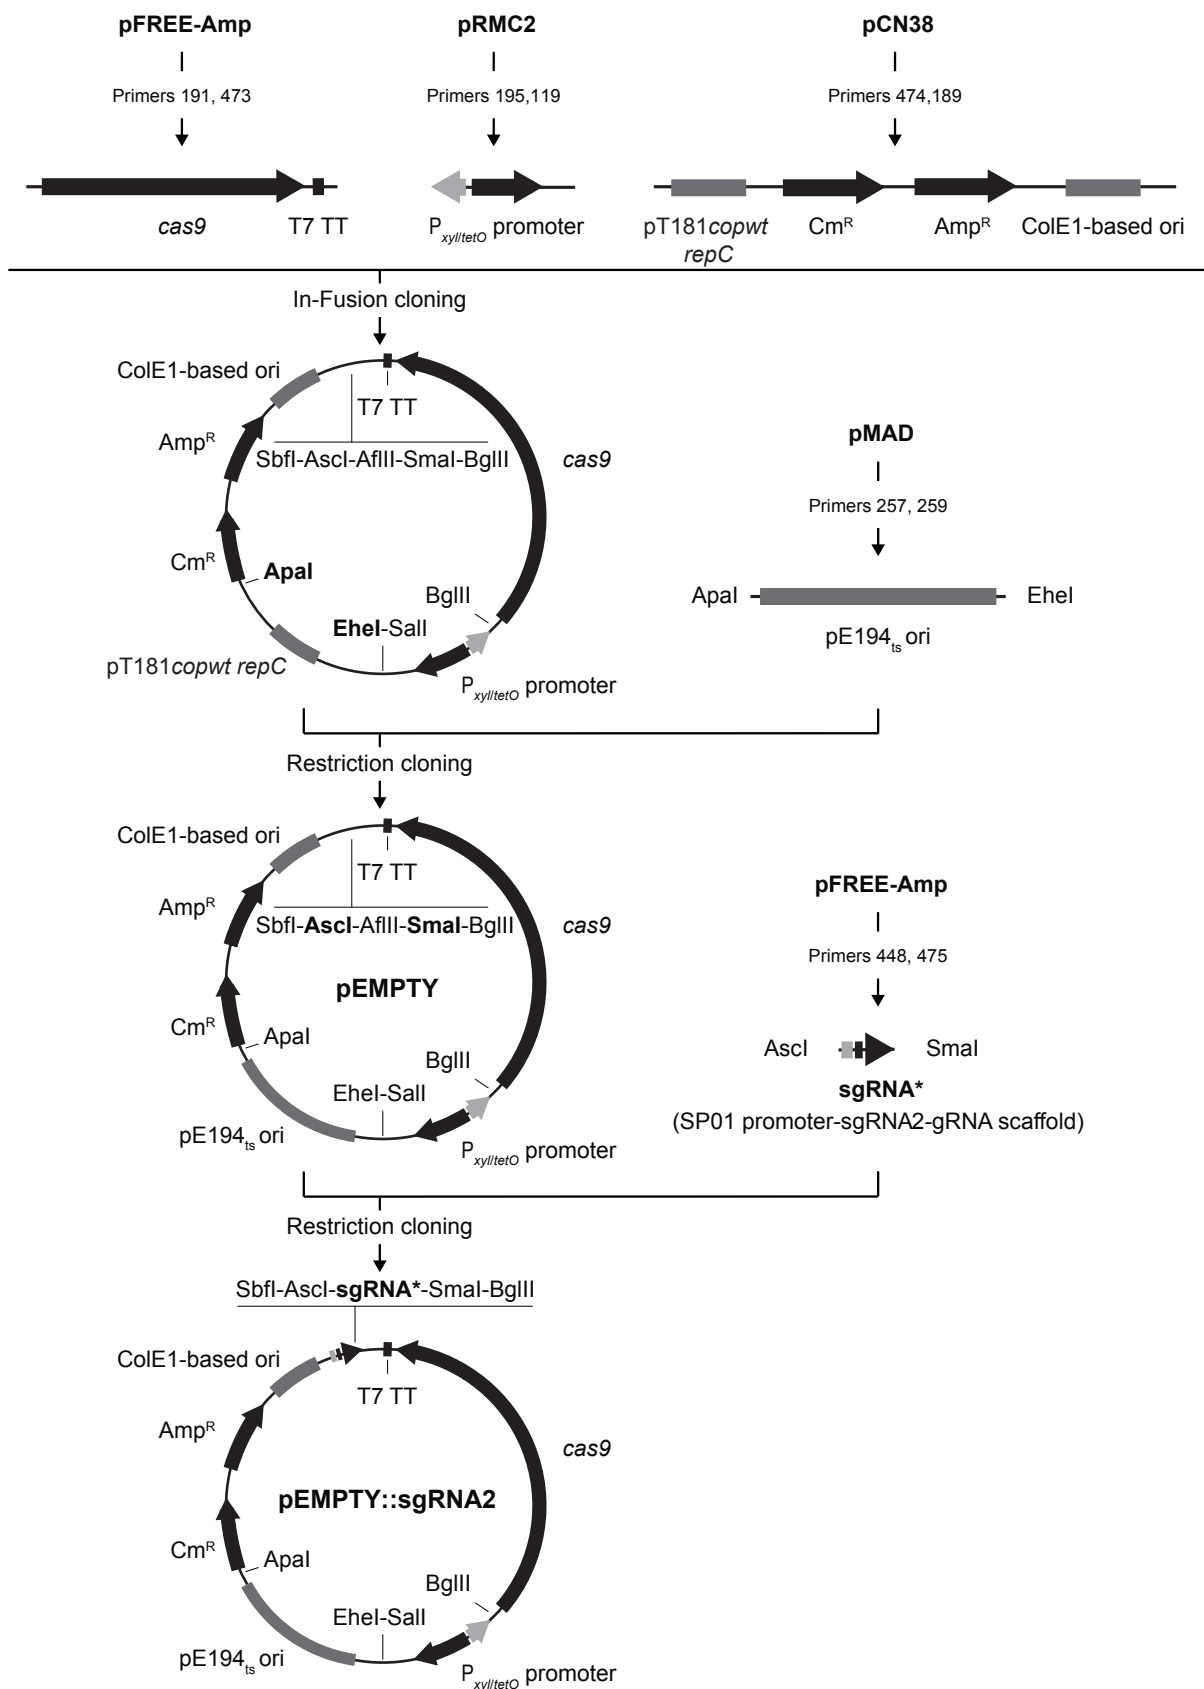

**Fig. S1. Schematic representation of the construction of the pEMPTY::sgRNA2 plasmid.**
