# Supplementary material for: Fitness Cost Evolution of Natural Plasmids of Staphylococcus aureus
Source: PubMed Central journal article supplement (PMC8545097; doi:10.1128/mbio.03094-20), 2021-02-23
Supplement: mbio.03094-20-sf002.pdf [file mbio.03094-20-sf002.pdf]

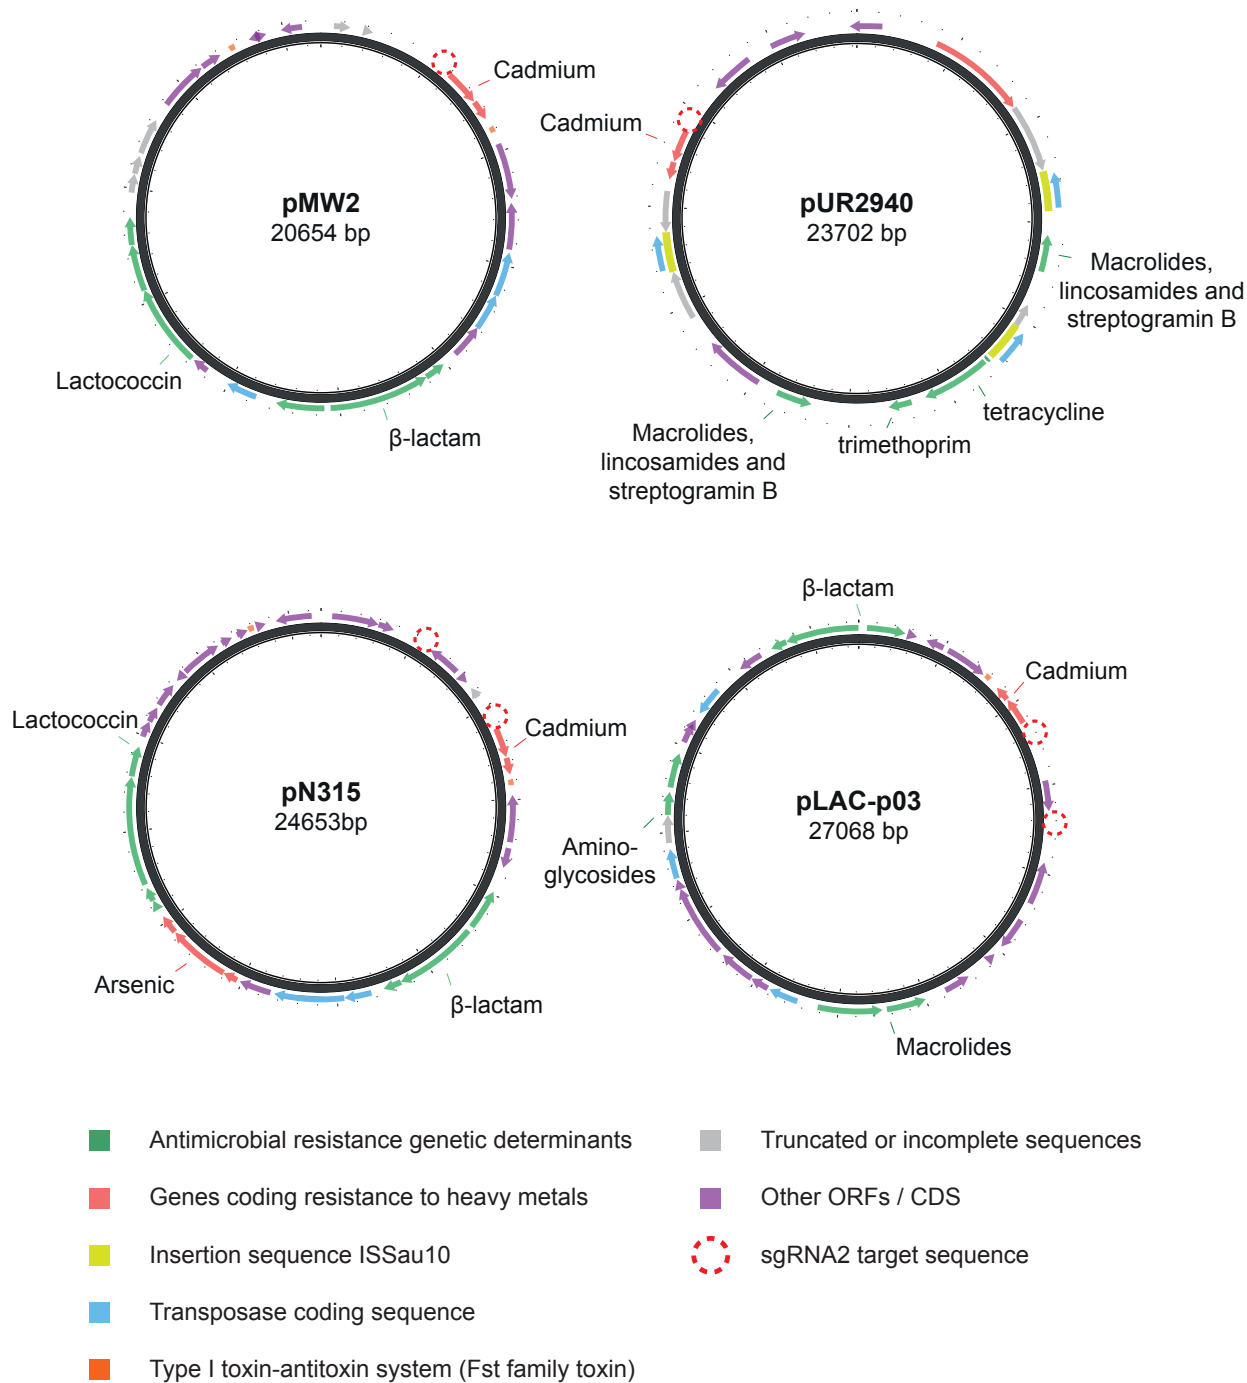

**Fig. S2. Maps of plasmids pMW2, pUR2940, pN315 and pLAC-p03.** Images were generated with the BLAST Ring Image Generator (BRIG) using plasmid sequences retrieved from the NCBI RefSeq database or obtained by Illumina sequencing.
