# Supplementary material for: Fitness Cost Evolution of Natural Plasmids of Staphylococcus aureus
Source: PubMed Central journal article supplement (PMC8545097; doi:10.1128/mbio.03094-20), 2021-02-23
Supplement: mbio.03094-20-sf003.pdf [file mbio.03094-20-sf003.pdf]

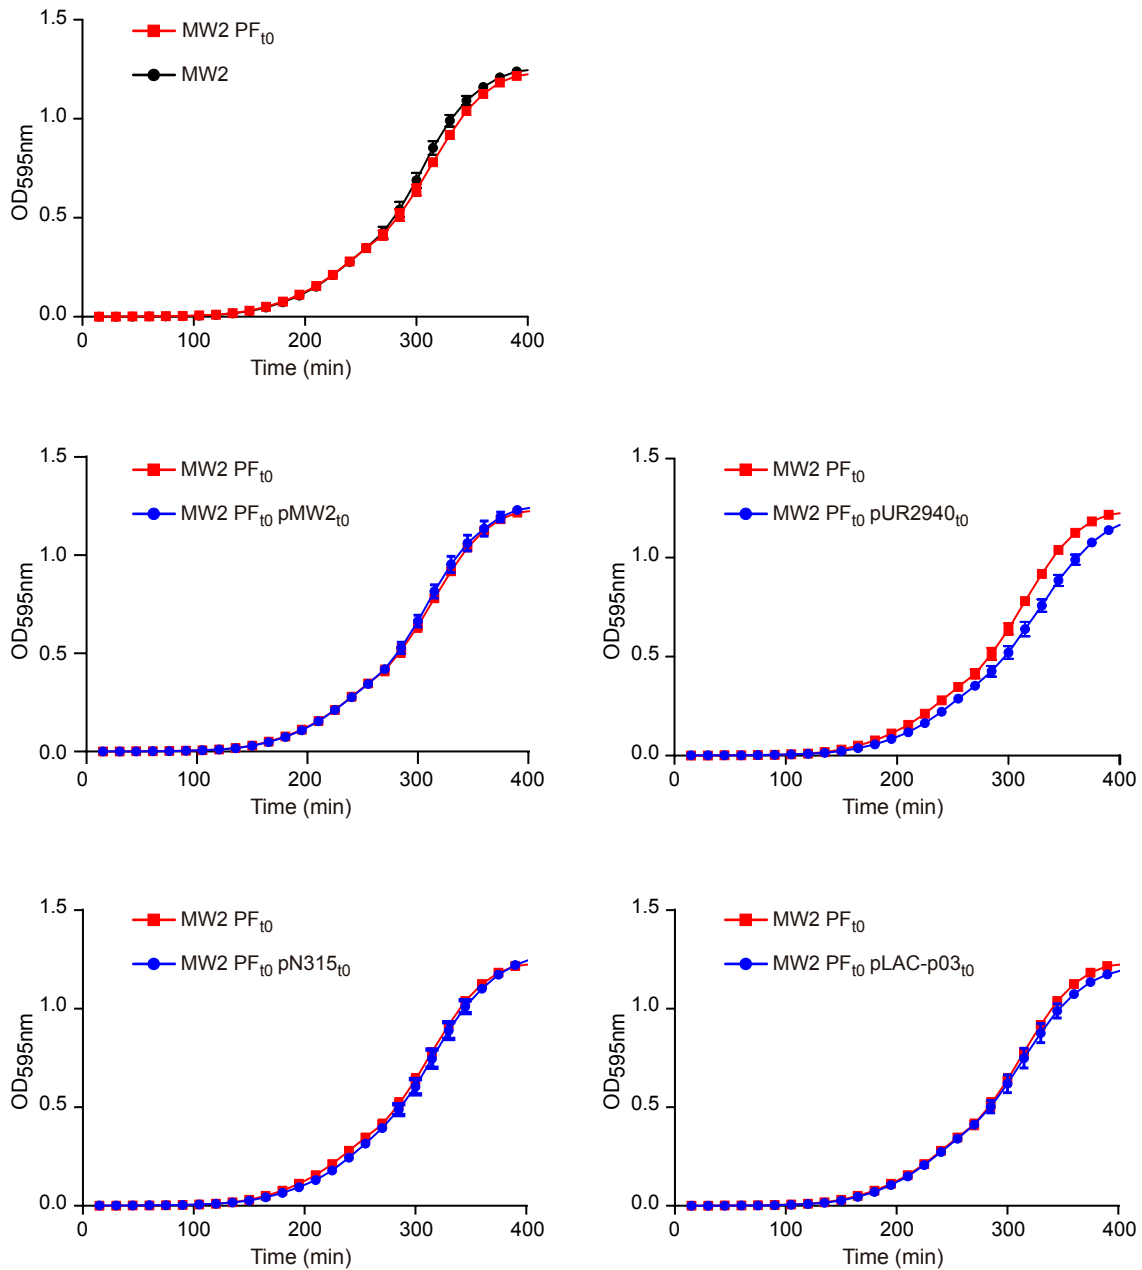

**Fig. S3. Growth curve of plasmid-free MW2 (MW2 PF<sub>t0</sub>) compared with that of the wild type MW2 strain and MW2 PF<sub>t0</sub> transformed with plasmids pMW2, pUR2940, pN315, and pLAC-p03.** Data were collected every 15 minutes during growth in TSB medium in 96 multi-well plates for 6.5 hours at 37 °C under shaking conditions. The average OD<sub>595nm</sub> values and standard deviation from ten technical replicates were plotted for each of the tested strains. In the case of MW2 PF<sub>t0</sub> transformed with plasmids pMW2, pUR2940, pN315, and pLAC-p03, results of one representative clone of the three independently transformed clones are shown.
